# Supplementary material for: Creation of mesopores in carbon nanotubes with improved capacities for lithium ion batteries
Source: Royal Society of Chemistry journal article supplement (doi:10.1039/c4cp04386c), 2014-10-15
Supplement: c4cp04386c1.pdf [file c4cp04386c1.pdf]

## Supporting information

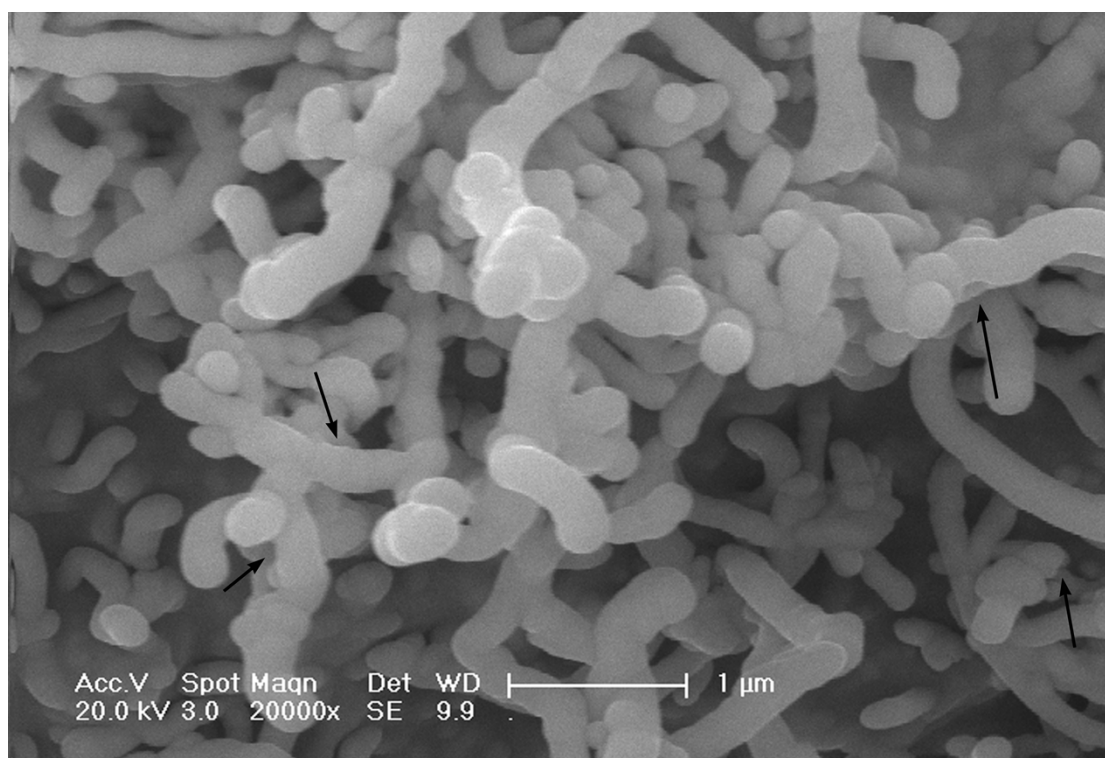

**Figure S1.** SEM image of PCNTs.

Because the sample was sputtered by Au nanoparticles before SEM measurement, so it is relatively hard to observe the mesopores on PCNTs. As indicated by arrows, there are some mesopores on the surface of PCNTs.

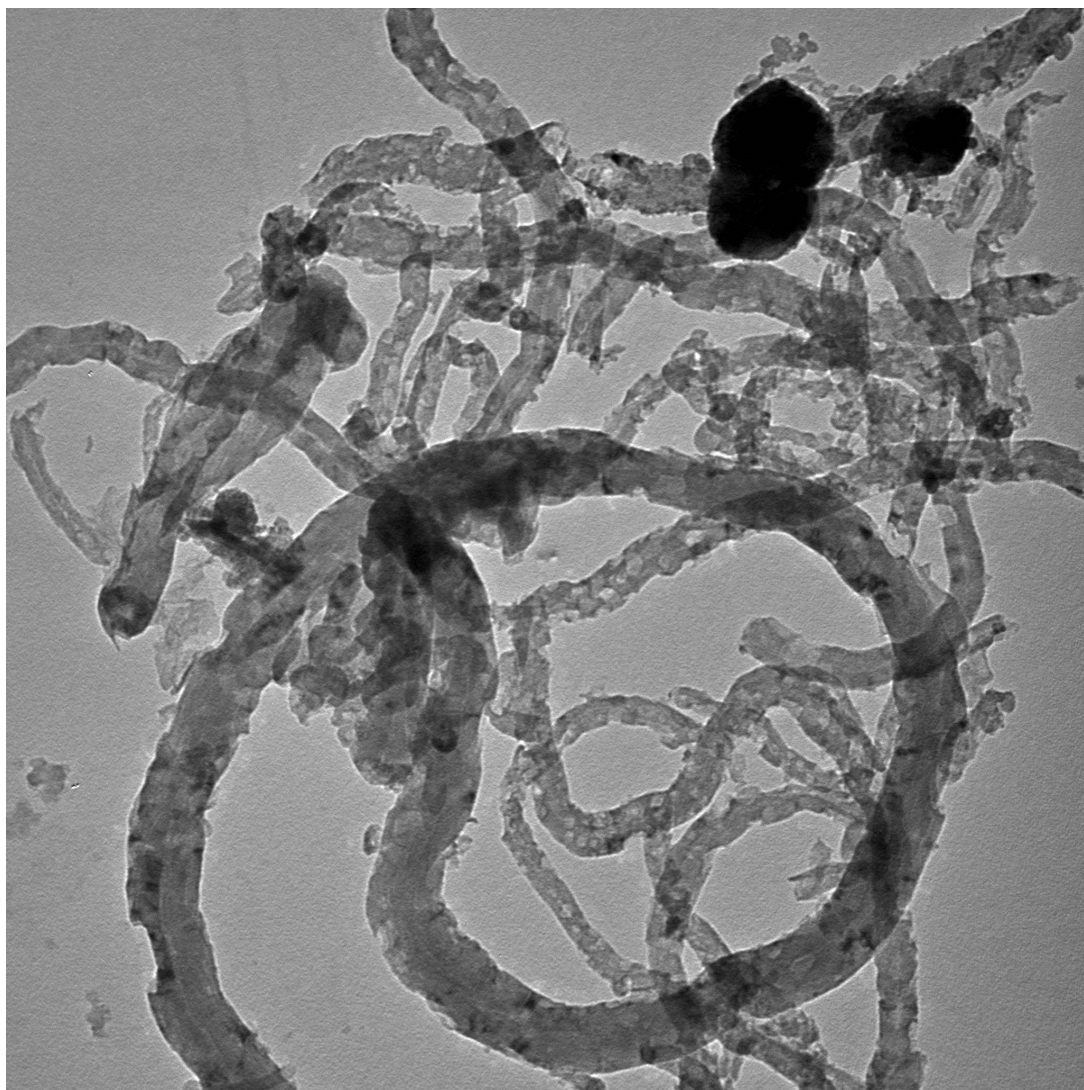

|                                                                                     |        |          |      |      |          |
|-------------------------------------------------------------------------------------|--------|----------|------|------|----------|
|  | 显微镜    | 加速电压     | 放大倍率 | 相机长度 |          |
| JEM-1011                                                                            | 100 kV | 100000 x | -    |      | —200 nm— |

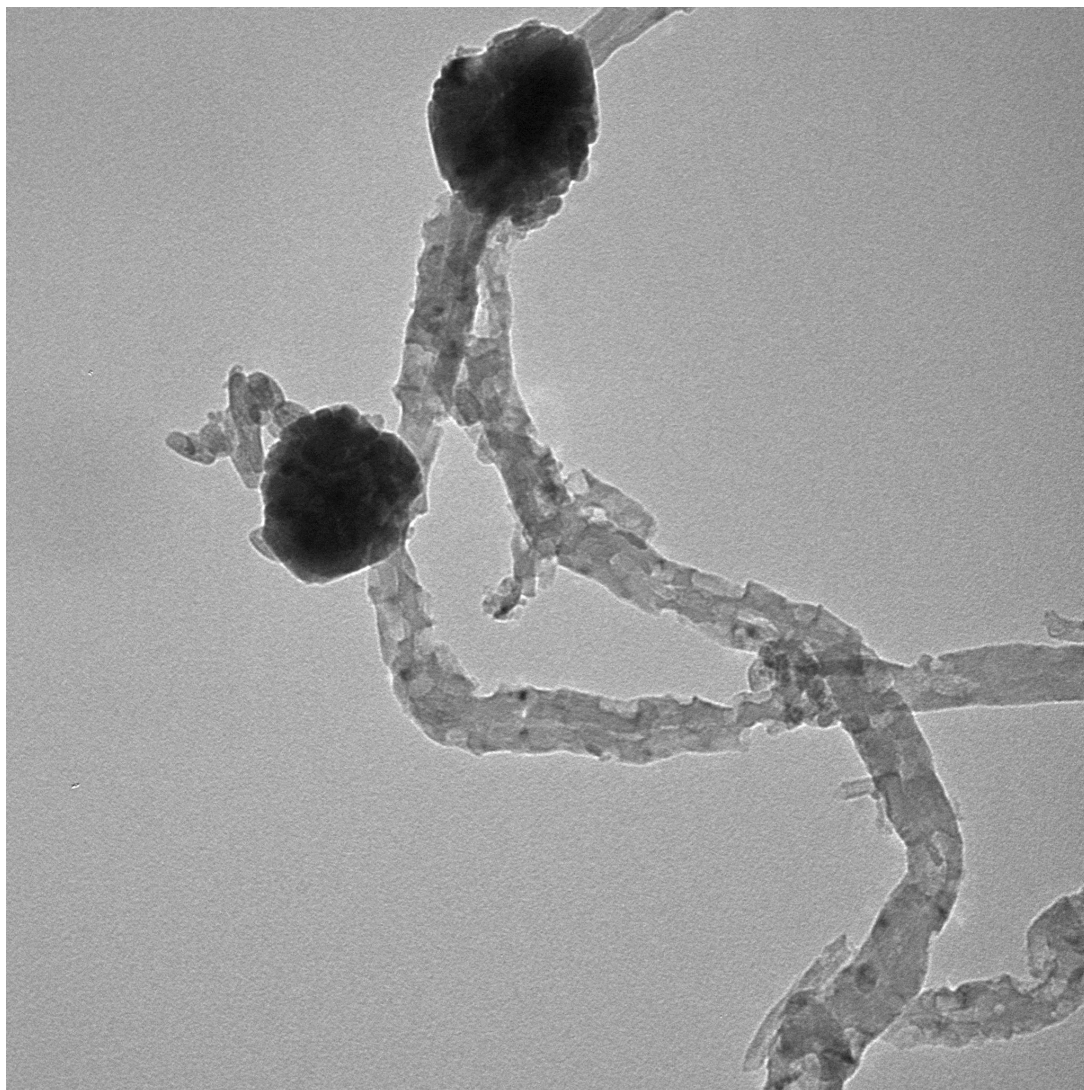

| 显微镜      | 加速电压   | 放大倍率     | 相机长度 |            |
|----------|--------|----------|------|------------|
| JEM-1011 | 100 kV | 150000 x | -    | ——200 nm—— |
